# Supplementary material
Source: Royal Society of Chemistry journal article supplement (https://www.rsc.org/suppdata/cc/1999/799/902035g.doc)
Supplement: Supplementary file 1 [file 902035g.doc]

**Supplementary Material**

**Analysis method for the UV-Vis titration data**

Consider the equilibrium

A+B D AB

with equilibrium constant *K*.

When the total concentrations added, *c*A and *c*B, are known, the actual concentration of complex, [AB] can be calculated:

At a wavelength at which A and B do not absorb, the absorbance is given by:

where *ε*is the extinction coefficient of the AB complex at that particular wavelength.

Thus, from a series of absorbance measurements at different values for *c*A and/or *c*B both *K* and *ε*can be determined by least-squares fitting of the given function to the obtained data.

**Room temperature emission spectra of MK-Gd(fod)3 in benzene**

Emission spectra of a solution of Michler’s ketone and Gd(fod)3 in benzene, excitation at 410 nm. Dotted line: aerated solution, solid line: deoxygenated solution.

**Low temperature emission spectra of MK-Gd(fod)3 and MK-Gd(hfa)3**


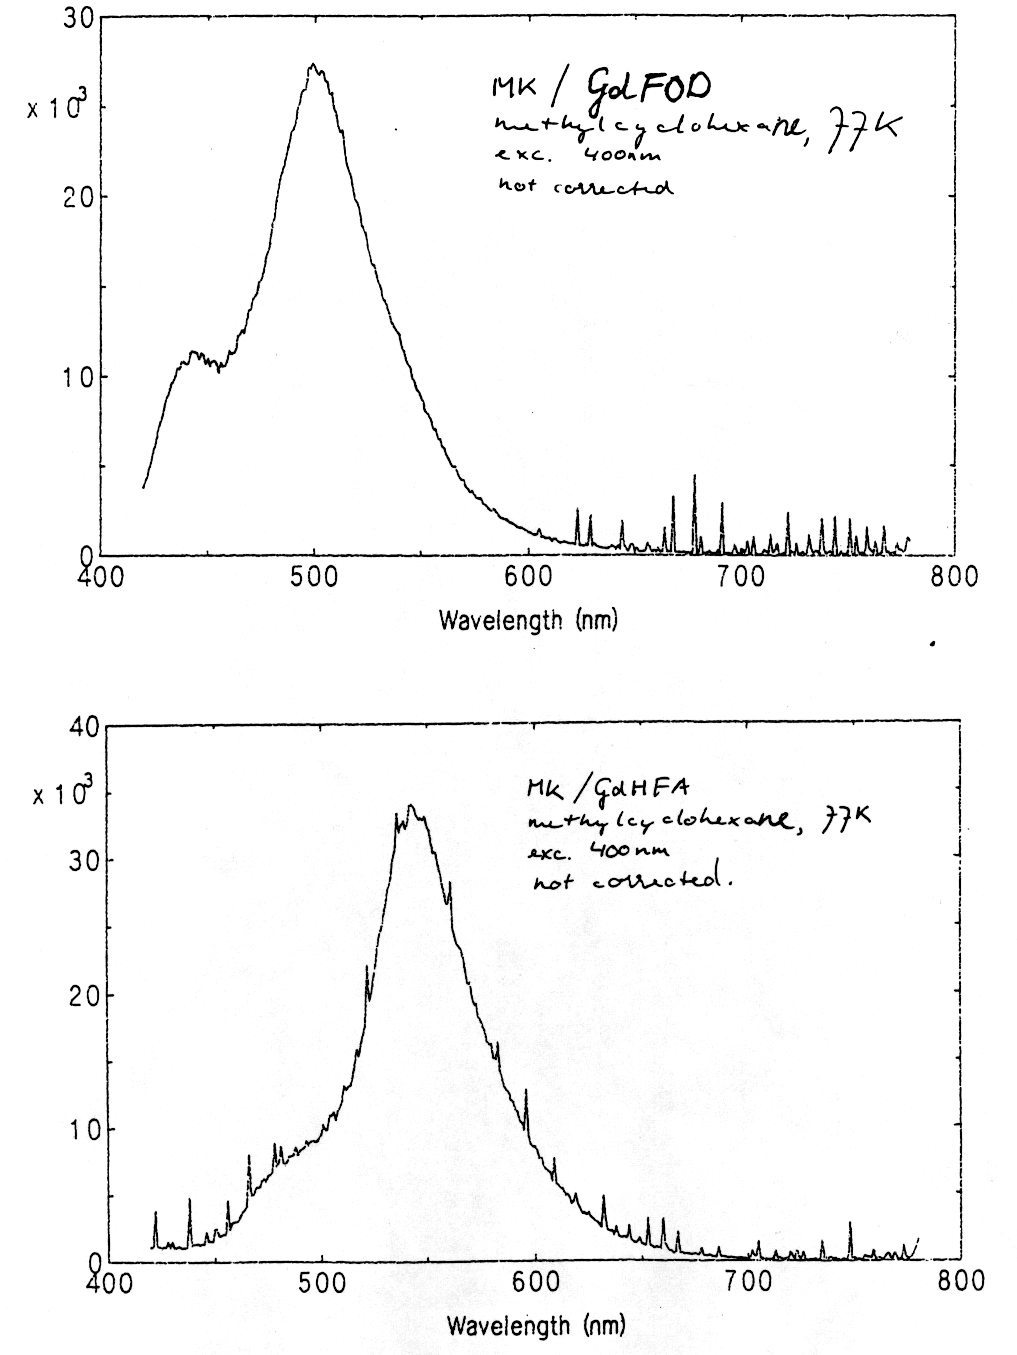


### **Absorption spectra of Nile Red and Phenol Blue in benzene**

Absorption spectra of Nile Red in benzene. Dotted line: before, solid line: after addition of Eu(fod)3

Absorption spectra of Phenol Blue in benzene. Dotted line: before, solid line: after addition of Eu(fod)3
